# Supplementary material for: 書評 ニール・ポストマン著『子どもはもういない』
Source: Royal Society of Chemistry journal article supplement (doi:10.1039/d4dt01077a), 2006-01-01
Supplement: d4dt01077a1.pdf [file d4dt01077a1.pdf]

# Synthesis of Ru(II) and Os(II) Photosensitizers Bearing one 9,10-diamino-1,4,5,8-tetraazaphenanthrene Scaffold

Simon De Keijger,<sup>‡</sup> Emilie Cauët,<sup>†</sup> Benjamin Elias<sup>‡,\*</sup> and Ludovic Troian-Gautier<sup>‡,ϕ\*</sup>

<sup>‡</sup>UCLouvain, Institut de la Matière Condensée et des Nanosciences (IMCN), Molecular Chemistry, Materials and Catalysis (MOST), Place Louis Pasteur 1/L4.01.02, B-1348 Louvain-la-Neuve, Belgium

<sup>†</sup>Spectroscopy, Quantum Chemistry and Atmospheric Remote Sensing (CP 160/09), Université libre de Bruxelles (ULB), 50 av. F. D. Roosevelt, CP160/09, B-1050 Brussels, Belgium

<sup>ϕ</sup>Wel Research Institute, Avenue Pasteur 6, 1300 Wavre, Belgium

\*Correspondence to: [Benjamin.Elias@uclouvain.be](mailto:Benjamin.Elias@uclouvain.be), [Ludovic.Troian@uclouvain.be](mailto:Ludovic.Troian@uclouvain.be)

## Table of contents

|                                                    |     |
|----------------------------------------------------|-----|
| Structure of the extended ligands .....            | S2  |
| <sup>1</sup> H NMR and HR-MS characterization..... | S3  |
| Electrochemistry .....                             | S11 |
| DFT Calculations .....                             | S15 |

## Structure of the extended ligands

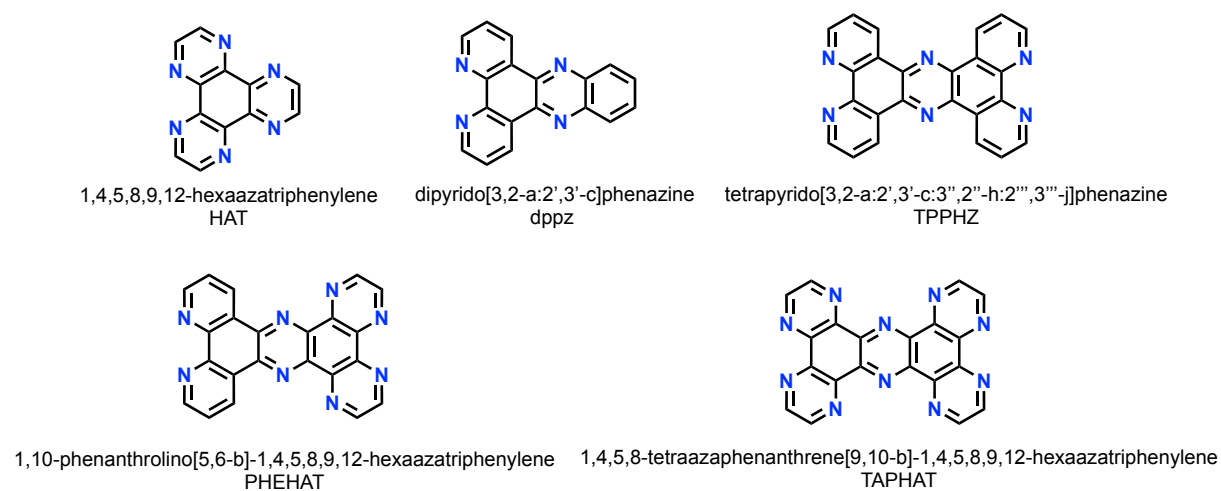

**Chart S1.** Structure of 1,4,5,8,9,12-hexaazatriphenylene (HAT), dipyrido[3,2-a:2',3'-c]phenazine (dppz), tetrapyrido[3,2-a:2',3'-c:3'',2''-h:2''',3'''-j]phenazine (TPPHZ), 1,10-phenanthrolino[5,6-b]-1,4,5,8,9,12-hexaazatriphenylene (PHEHAT) and 1,4,5,8-tetraazaphenanthrene[9,10-b]-1,4,5,8,9,12-hexaazatriphenylene (TAPHAT)

## $^1\text{H}$ NMR and HR-MS characterization

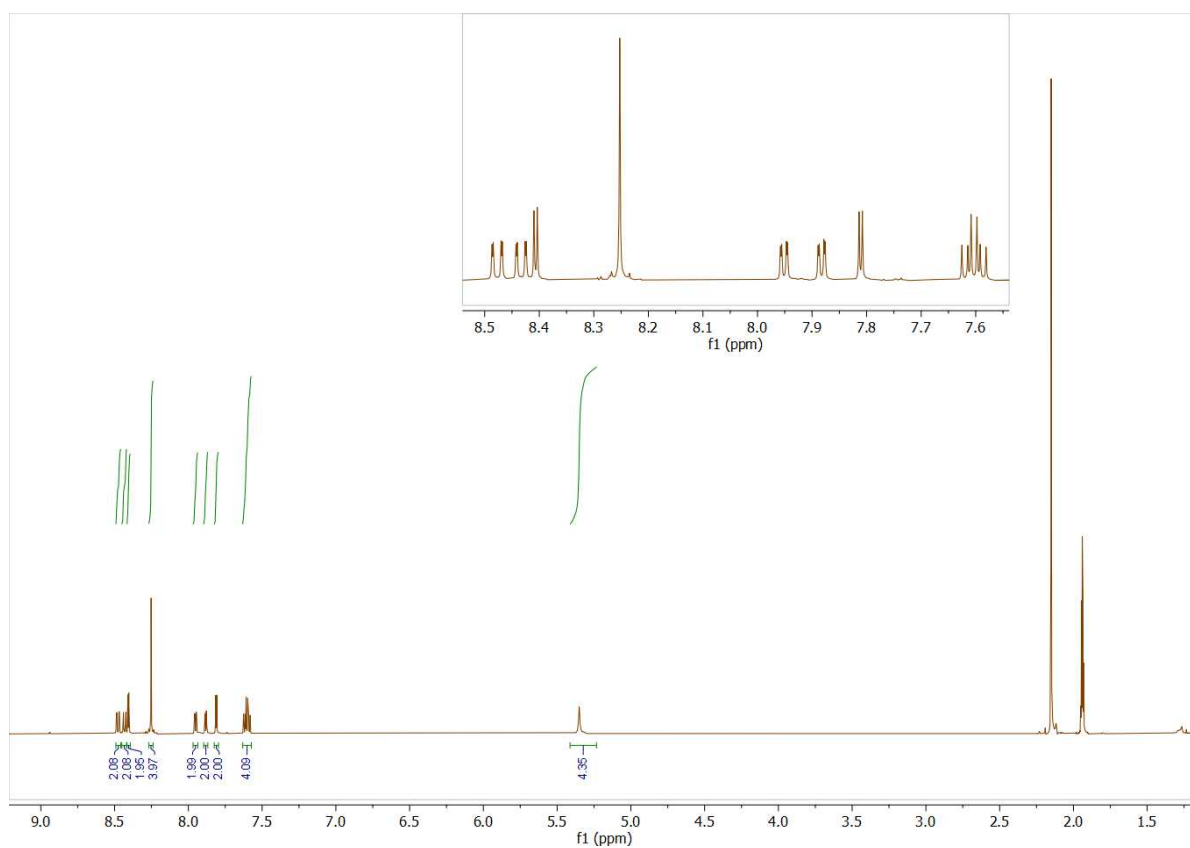

**Figure S1.**  $^1\text{H}$  NMR spectrum of  $[\text{Os}(\text{phen})_2(\text{diNH}_2\text{TAP})]^{2+}$  recorded in  $\text{CD}_3\text{CN}$  at 500 MHz and 298 K.

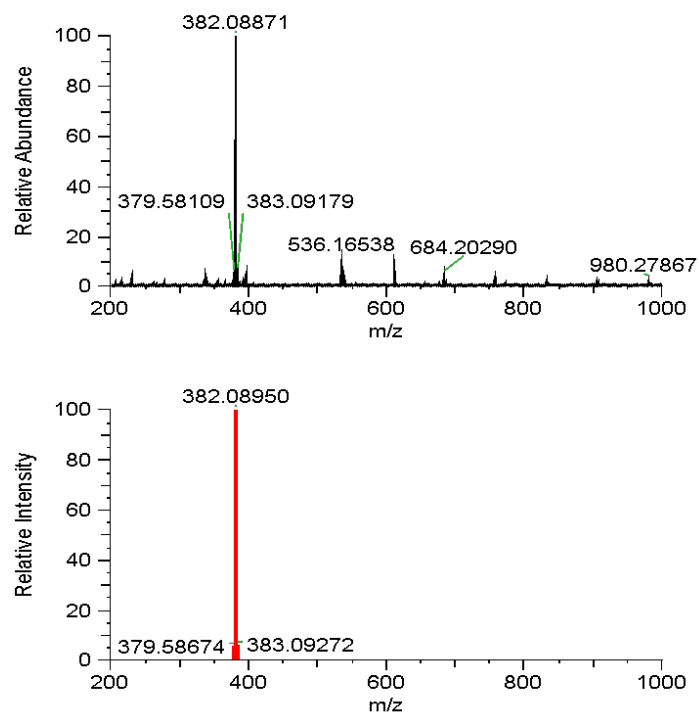

**Figure S2.** HR-MS spectrum of  $[\text{Os}(\text{phen})_2(\text{diNH}_2\text{TAP})]^{2+}$ .

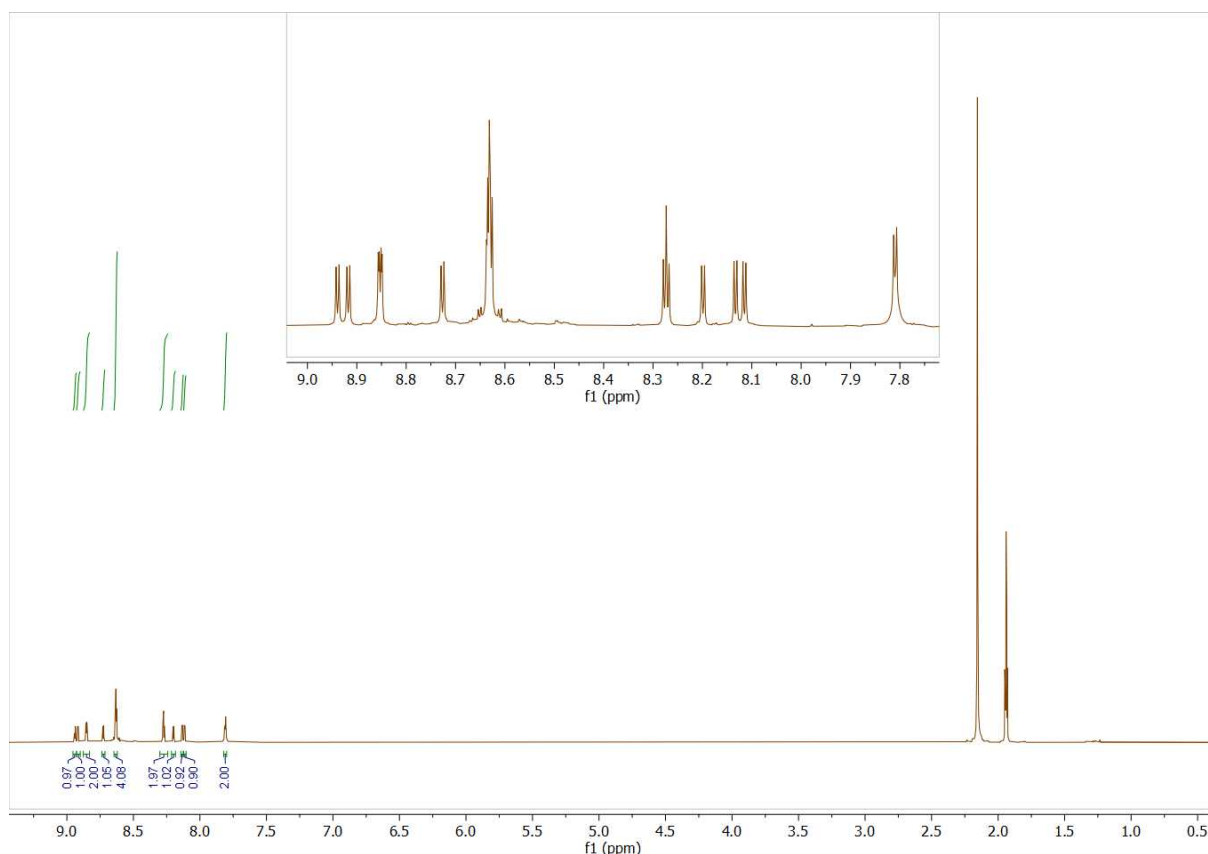

**Figure S3.** <sup>1</sup>H NMR spectrum of  $[\text{Os}(\text{TAP})_2(\text{NO}_2\text{NH}_2\text{TAP})]^{2+}$  recorded in  $\text{CD}_3\text{CN}$  at 500 MHz and 298 K.

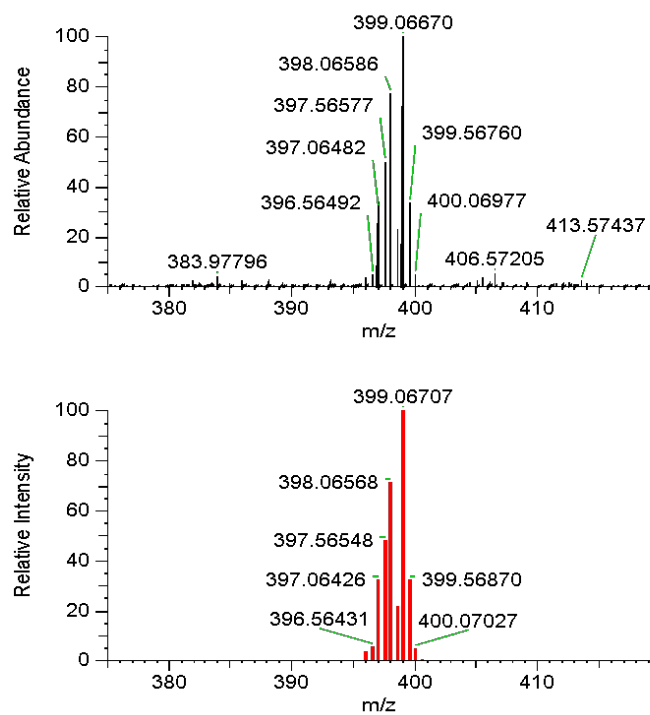

**Figure S4.** HR-MS spectrum of  $[\text{Os}(\text{TAP})_2(\text{NO}_2\text{NH}_2\text{TAP})]^{2+}$ .

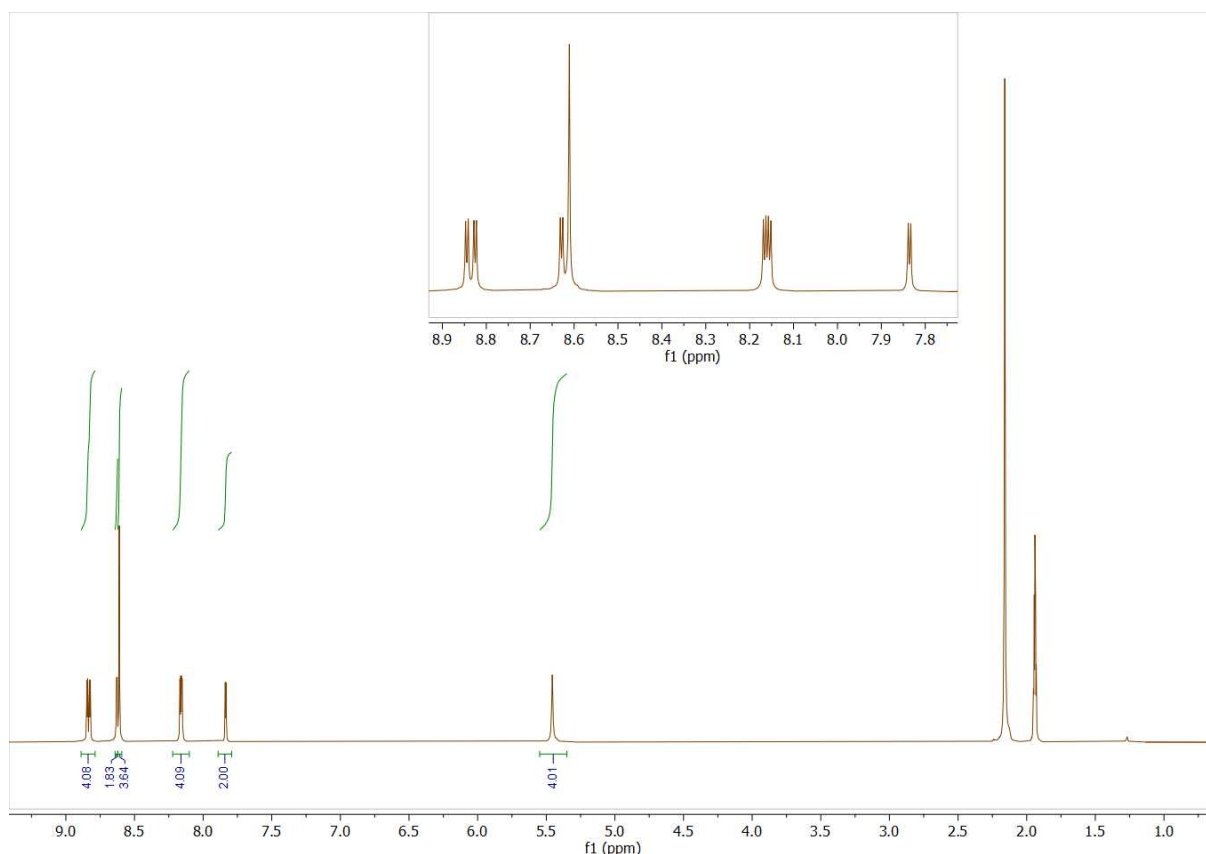

**Figure S5.**  $^1\text{H}$  NMR spectrum of  $[\text{Os}(\text{TAP})_2(\text{diNH}_2\text{TAP})]^{2+}$  recorded in  $\text{CD}_3\text{CN}$  at 500 MHz and 298 K.

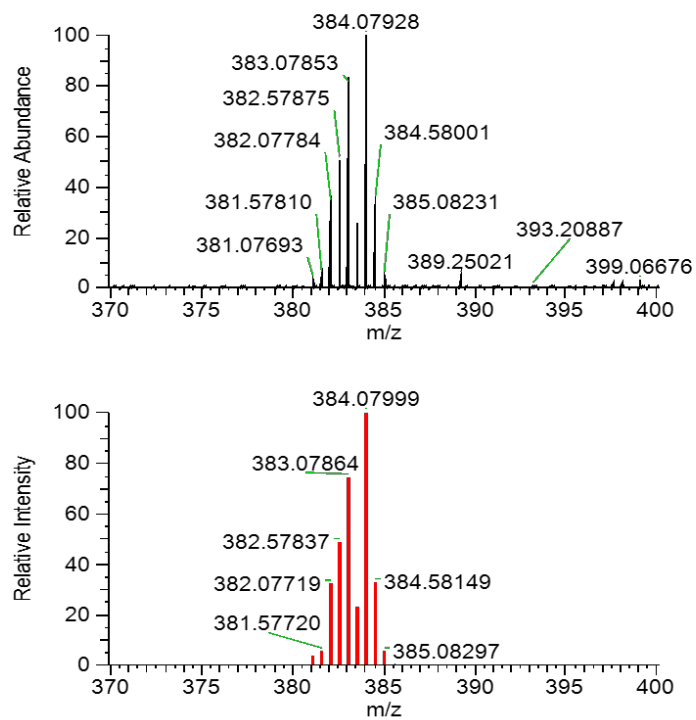

**Figure S6.** HR-MS spectrum of  $[\text{Os}(\text{TAP})_2(\text{diNH}_2\text{TAP})]^{2+}$ .

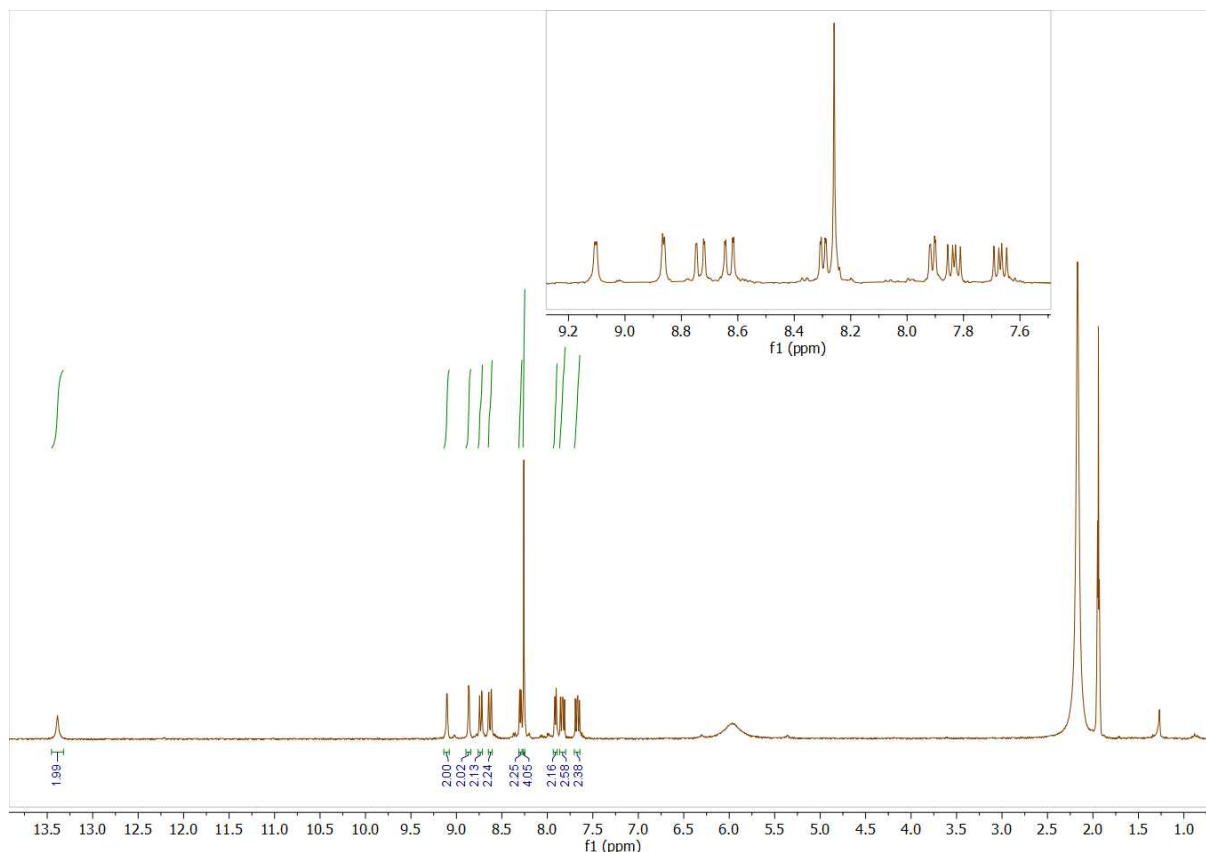

**Figure S7.**  $^1\text{H}$  NMR spectrum of  $[\text{Ru}(\text{phen})_2(\text{diiminoTAP})]^{2+}$  recorded in  $\text{CD}_3\text{CN}$  at 300 MHz and 298 K.

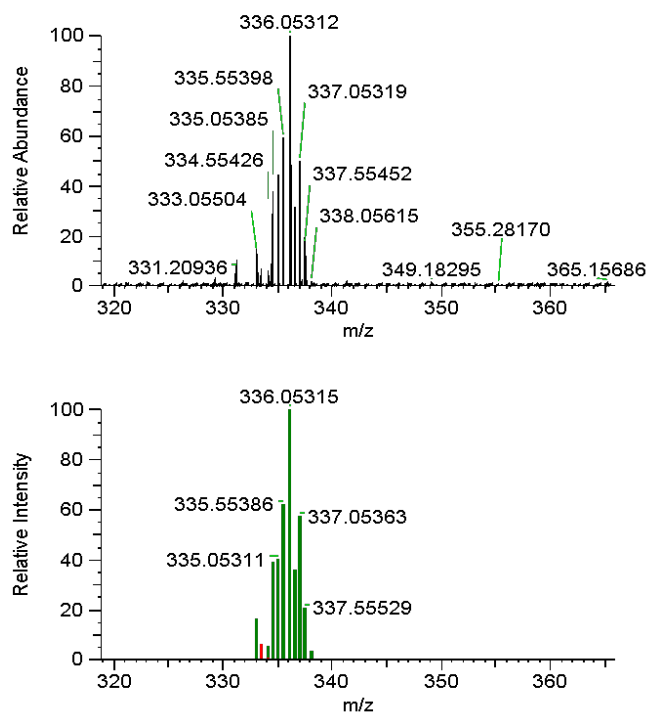

**Figure S8.** HR-MS spectrum of  $[\text{Ru}(\text{phen})_2(\text{diiminoTAP})]^{2+}$ .

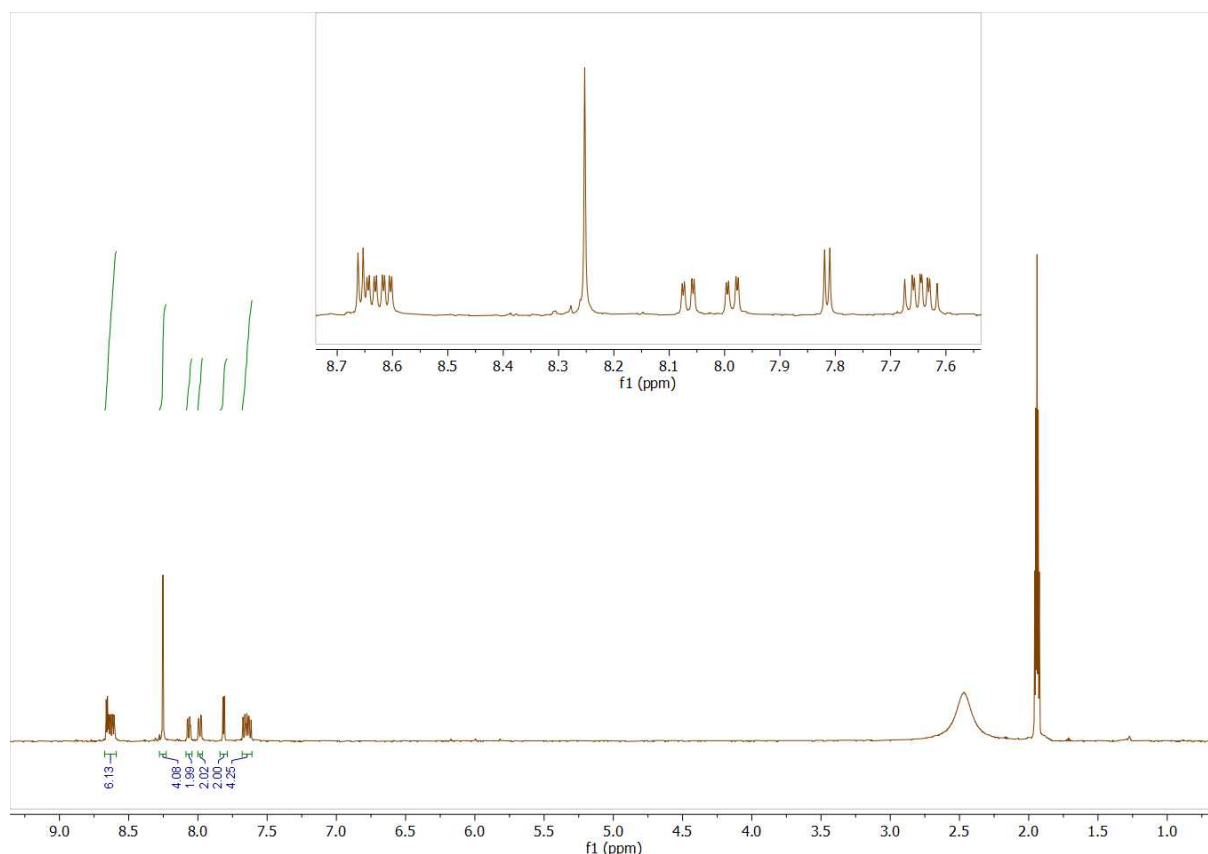

**Figure S9.**  $^1\text{H}$  NMR spectrum of  $[\text{Ru}(\text{phen})_2(\text{diNH}_2\text{TAP})]^{2+}$  recorded in  $\text{CD}_3\text{CN}$  at 300 MHz and 298 K.

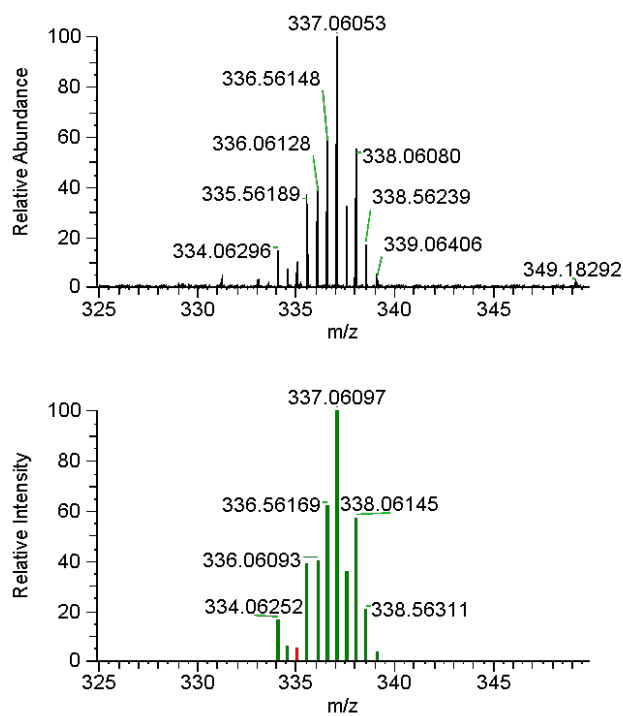

**Figure S10.** HR-MS spectrum of  $[\text{Ru}(\text{phen})_2(\text{diNH}_2\text{TAP})]^{2+}$ .

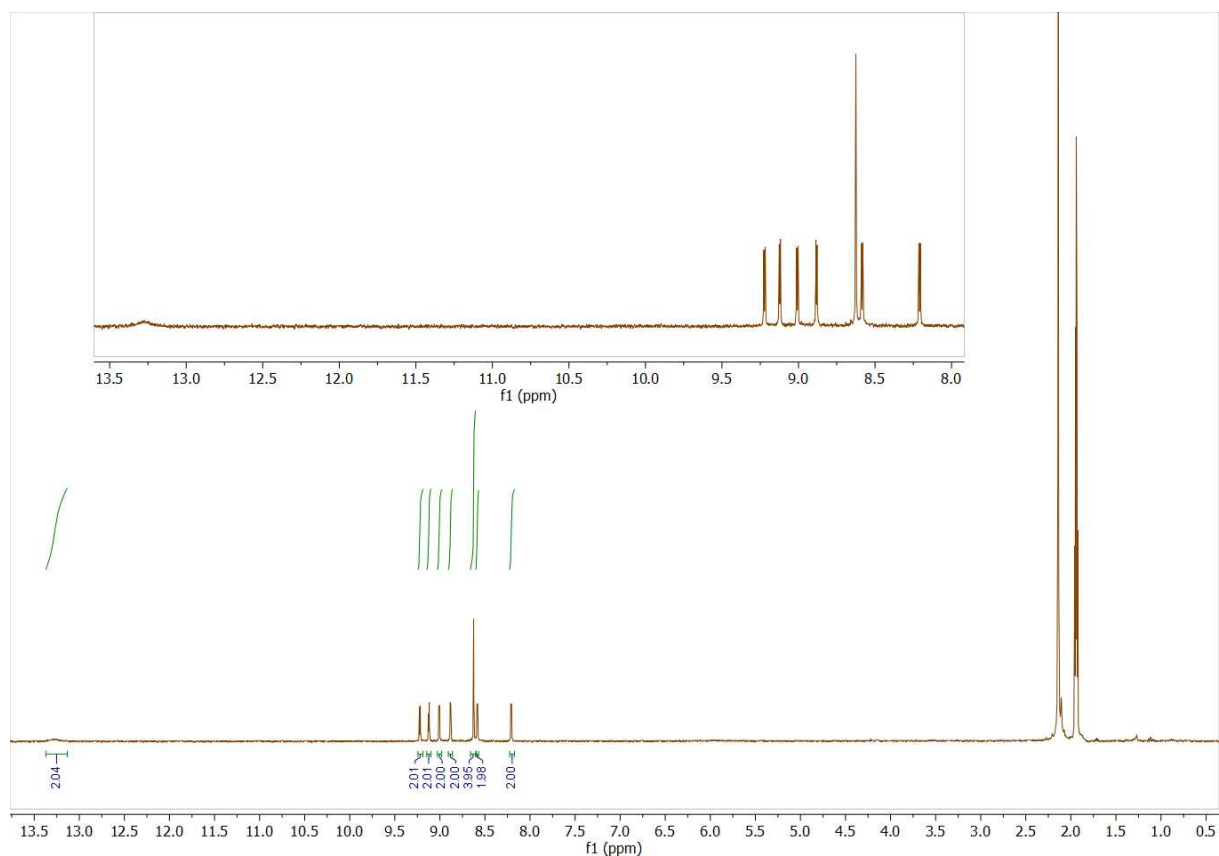

**Figure S11.**  $^1\text{H}$  NMR spectrum of  $[\text{Ru}(\text{TAP})_2(\text{diiminoTAP})]^{2+}$  recorded in  $\text{CD}_3\text{CN}$  at 300 MHz and 298 K.

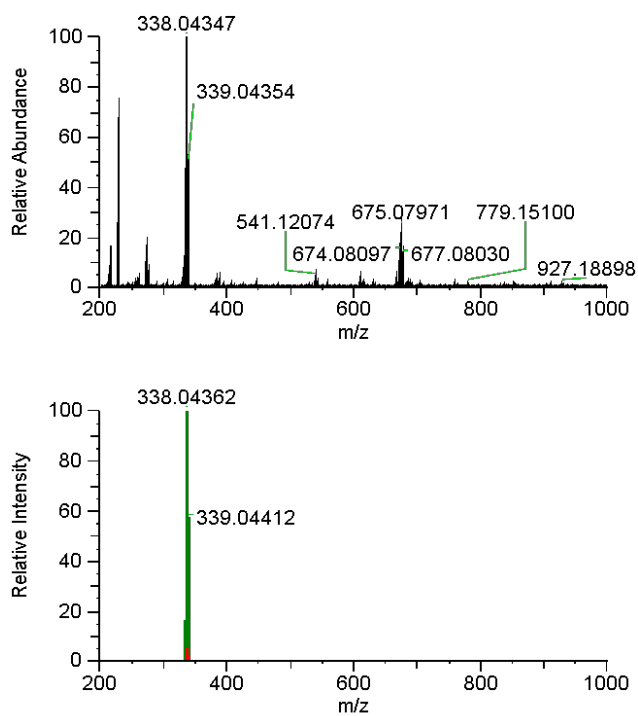

**Figure S12.** HR-MS spectrum of  $[\text{Ru}(\text{TAP})_2(\text{diiminoTAP})]^{2+}$ .



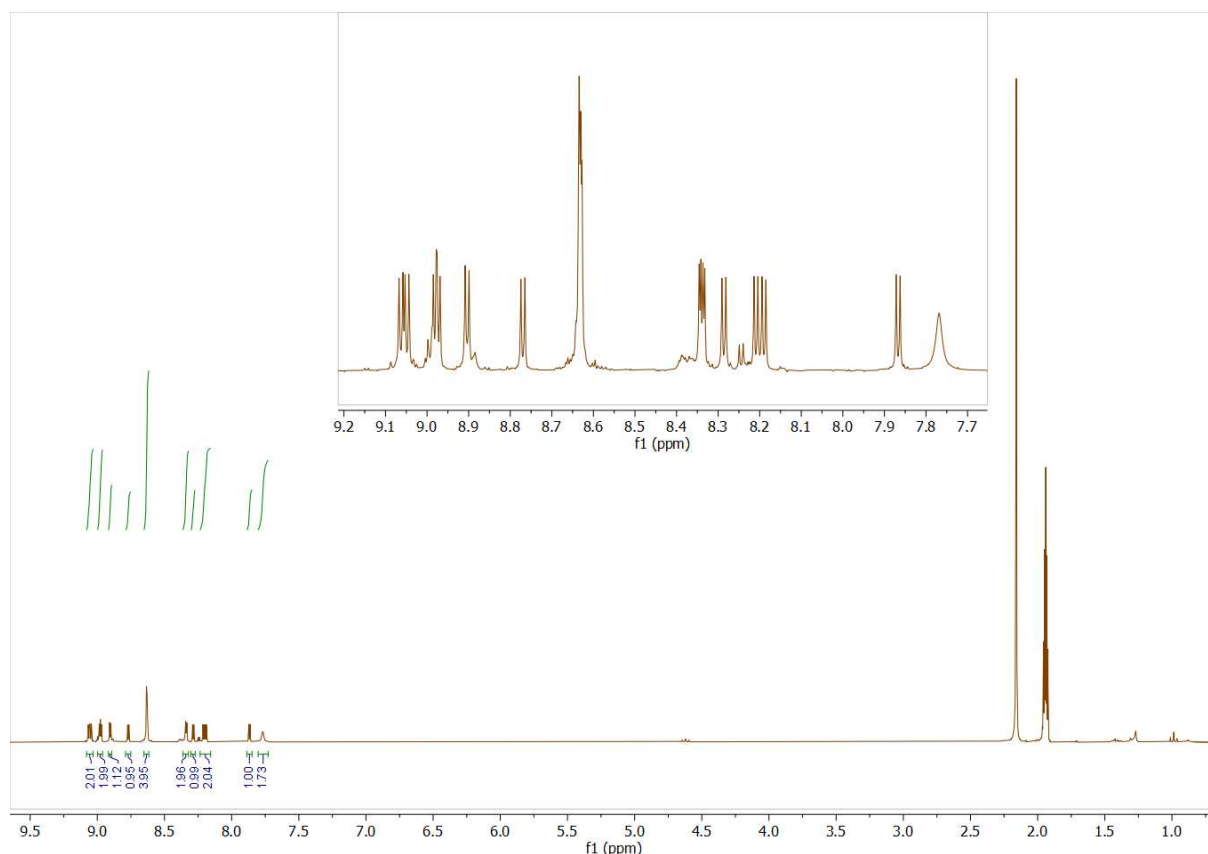

**Figure S13.**  $^1\text{H}$  NMR spectrum of  $[\text{Ru}(\text{TAP})_2(\text{NO}_2\text{NH}_2\text{TAP})]^{2+}$  recorded in  $\text{CD}_3\text{CN}$  at 300 MHz and 298 K.

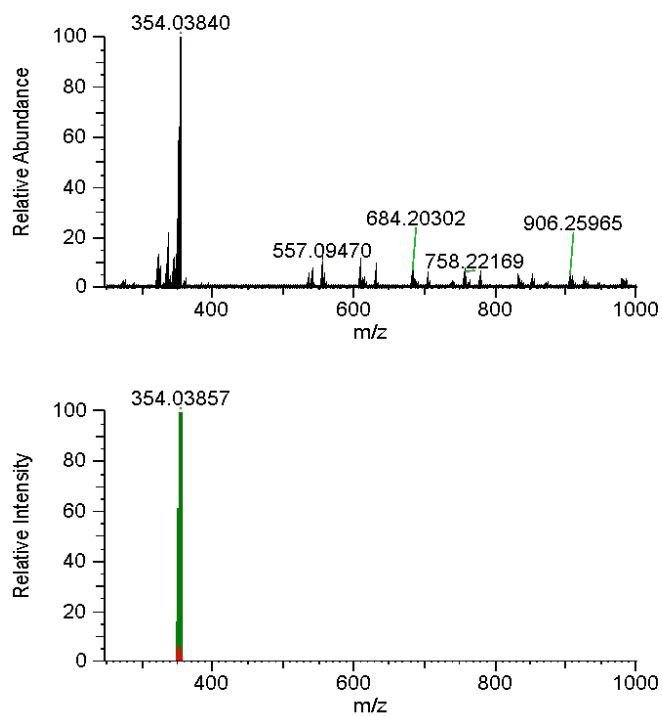

**Figure S14.** HR-MS spectrum of  $[\text{Ru}(\text{TAP})_2(\text{NO}_2\text{NH}_2\text{TAP})]^{2+}$ .

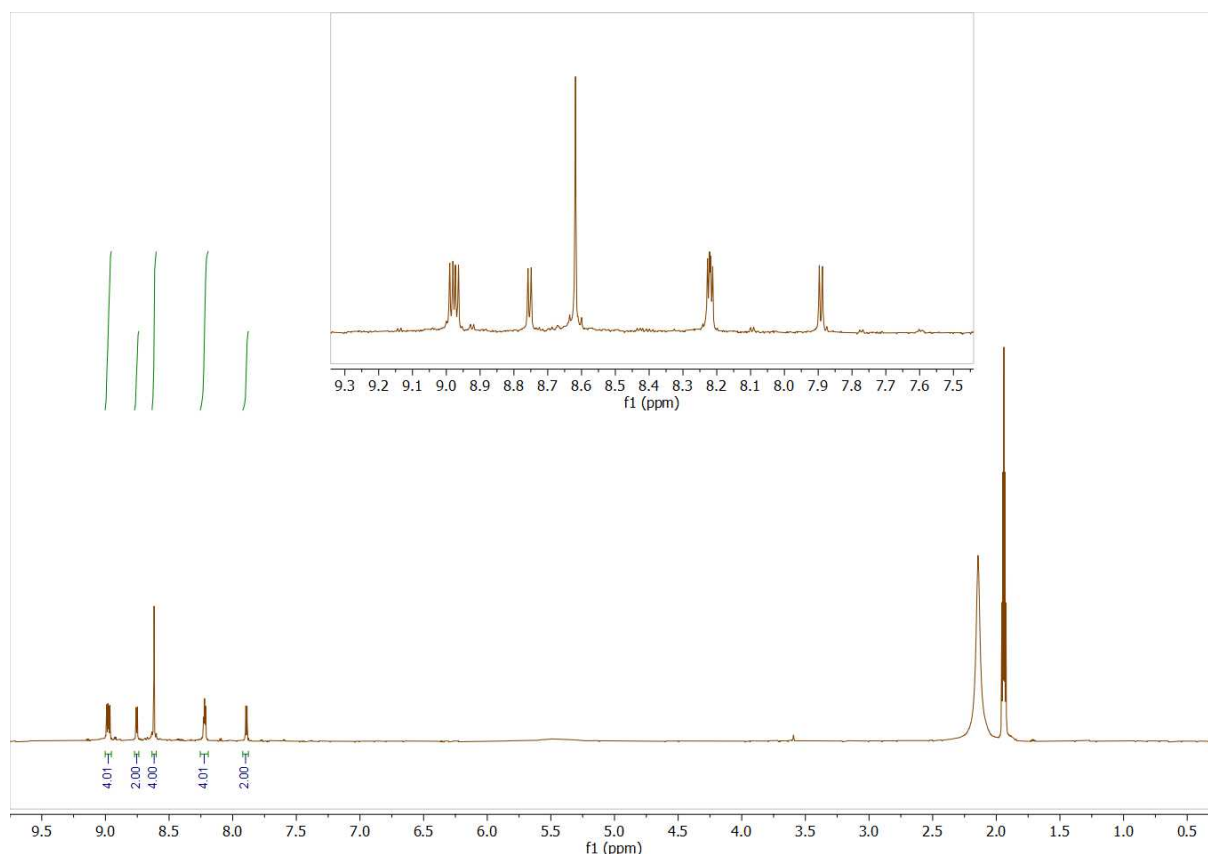

**Figure S15.**  $^1\text{H}$  NMR spectrum of  $[\text{Ru}(\text{TAP})_2(\text{diNH}_2\text{TAP})]^{2+}$  recorded in  $\text{CD}_3\text{CN}$  at 300 MHz and 298 K.

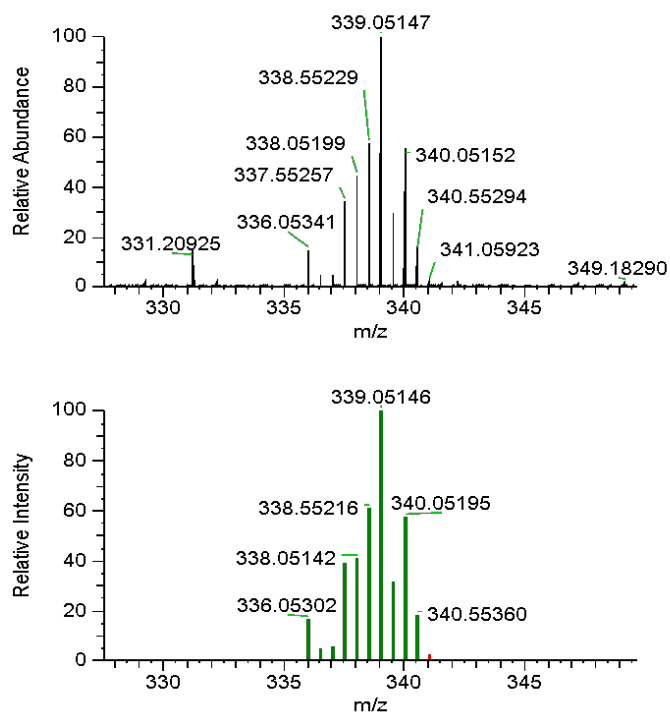

**Figure S16.** HR-MS spectrum of  $[\text{Ru}(\text{TAP})_2(\text{diNH}_2\text{TAP})]^{2+}$ .

## Electrochemistry

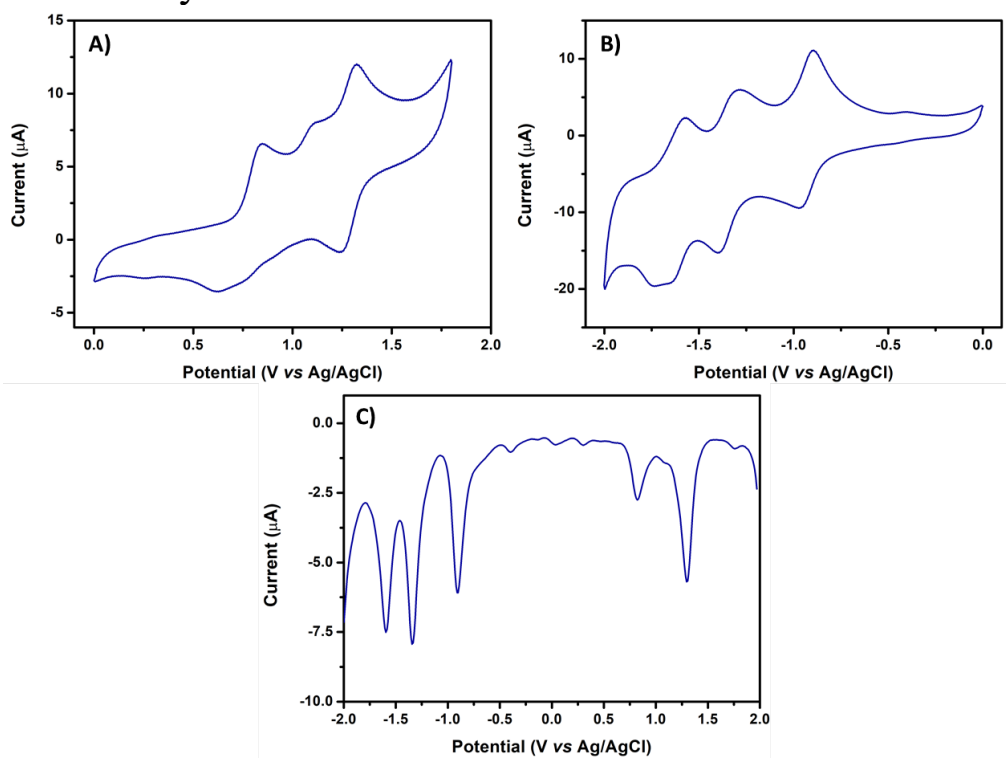

**Figure S17.** Cyclic voltammograms (A, B) and differential pulse voltammogram (C) of  $[\text{Os}(\text{phen})_2(\text{diNH}_2\text{TAP})]^{2+}$  in acetonitrile (0.1 V/s) with tetrabutylammonium hexafluorophosphate (0.1M) as supporting electrolyte.

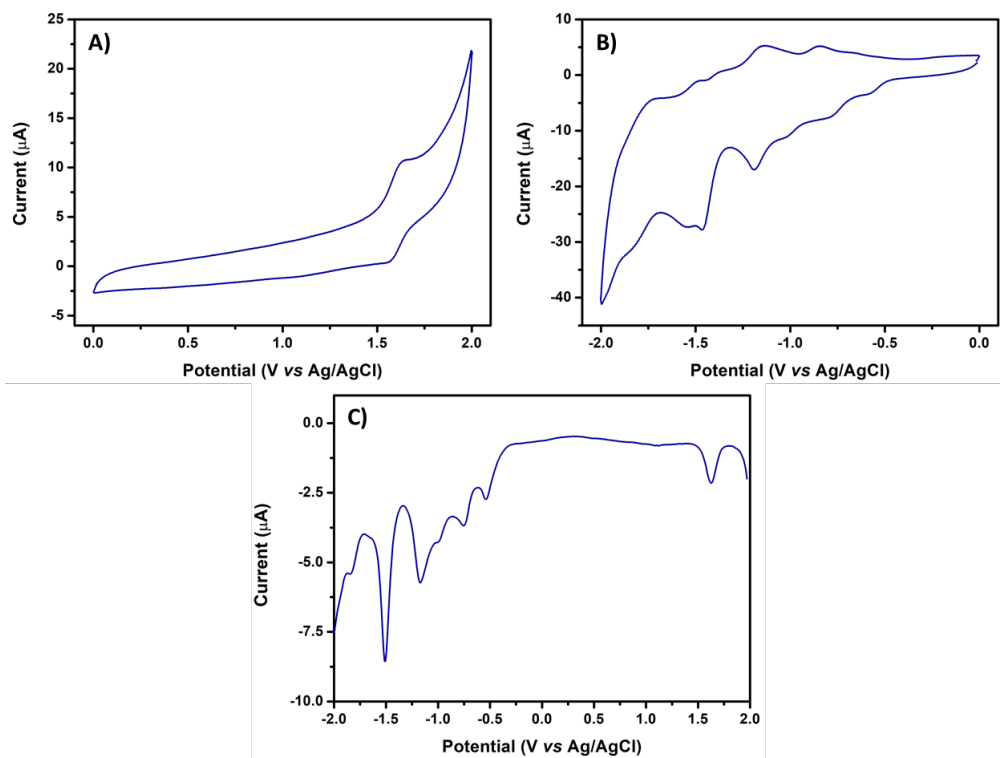

**Figure S18.** Cyclic voltammograms (A, B) and differential pulse voltammogram (C) of  $[\text{Os}(\text{TAP})_2(\text{NO}_2\text{NH}_2\text{TAP})]^{2+}$  in acetonitrile (0.1 V/s) with tetrabutylammonium hexafluorophosphate (0.1 M) as supporting electrolyte.

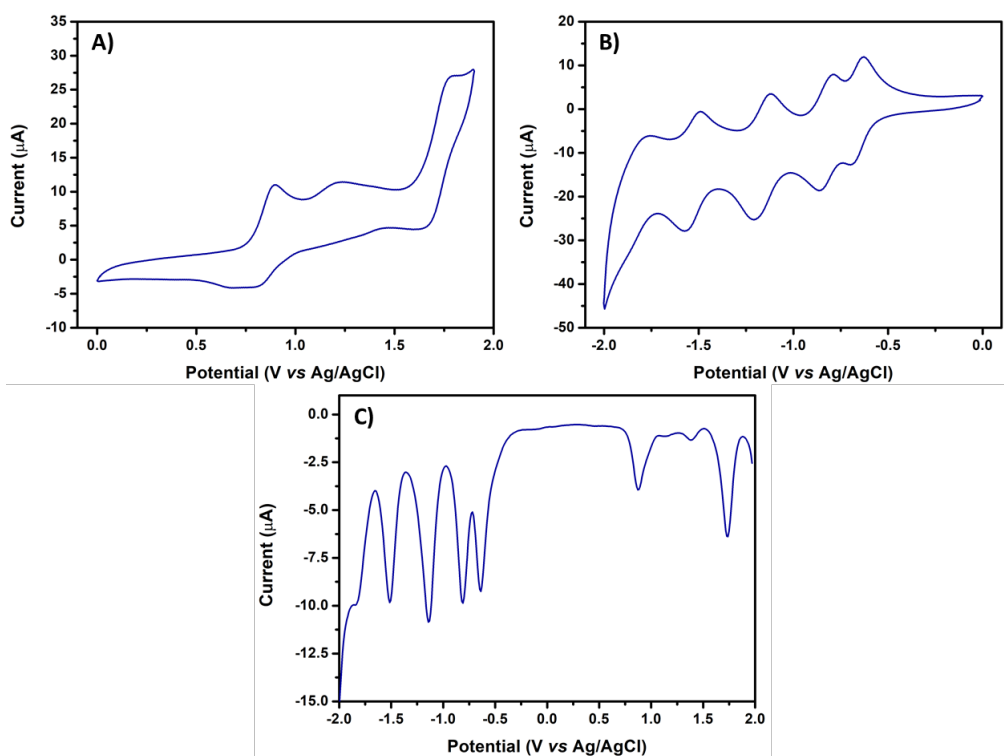

**Figure S19.** Cyclic voltammograms (A, B) and differential pulse voltammogram (C) of  $[\text{Os}(\text{TAP})_2(\text{diNH}_2\text{TAP})]^{2+}$  in acetonitrile (0.1 V/s) with tetrabutylammonium hexafluorophosphate (0.1 M) as supporting electrolyte.

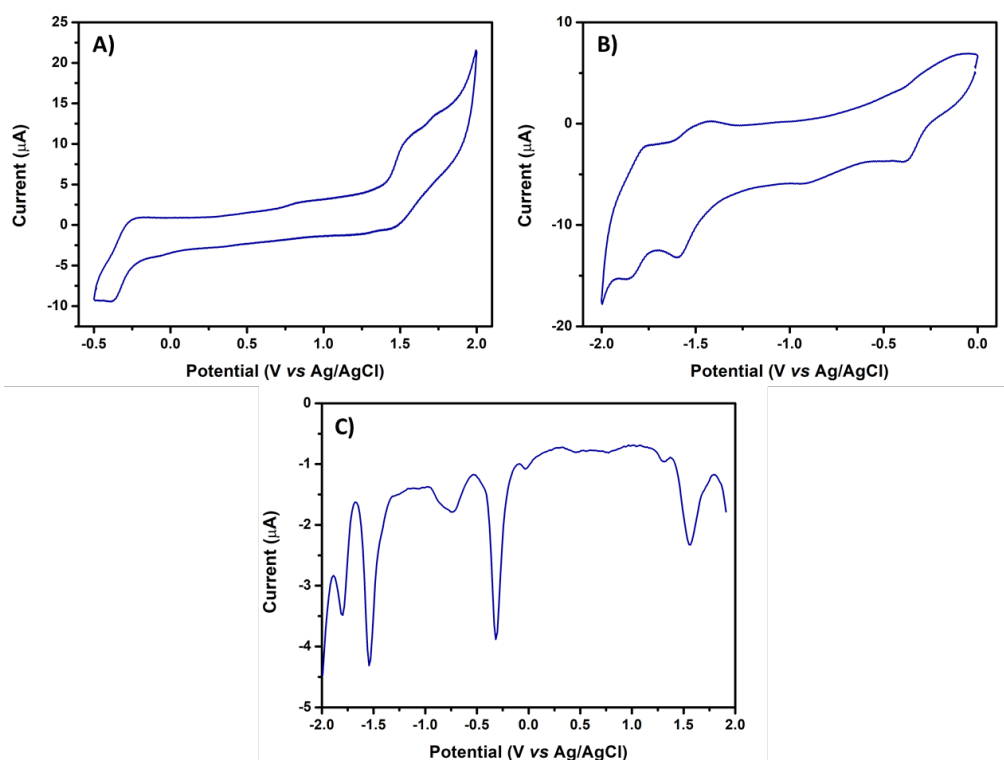

**Figure S20.** Cyclic voltammograms (A, B) and differential pulse voltammogram (C) of  $[\text{Ru}(\text{phen})_2(\text{diiminoTAP})]^{2+}$  in acetonitrile (0.1 V/s) with tetrabutylammonium hexafluorophosphate (0.1 M) as supporting electrolyte.

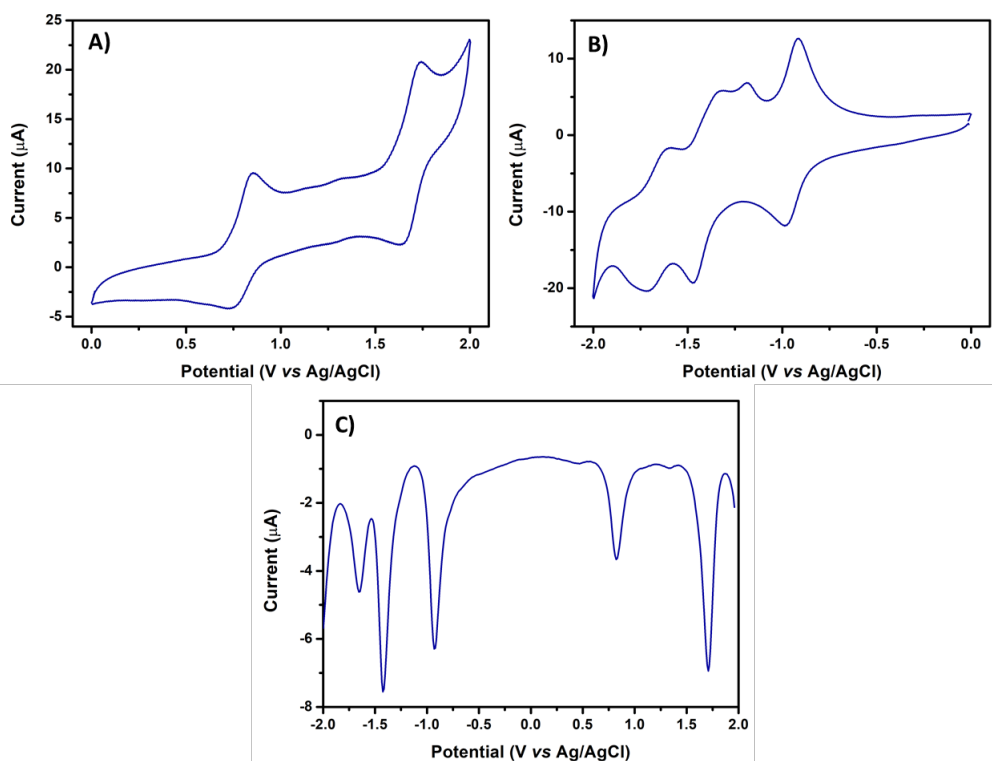

**Figure S21.** Cyclic voltammograms (A, B) and differential pulse voltammogram (C) of  $[\text{Ru}(\text{phen})_2(\text{diNH}_2\text{TAP})]^{2+}$  in acetonitrile (0.1 V/s) with tetrabutylammonium hexafluorophosphate (0.1 M) as supporting electrolyte.

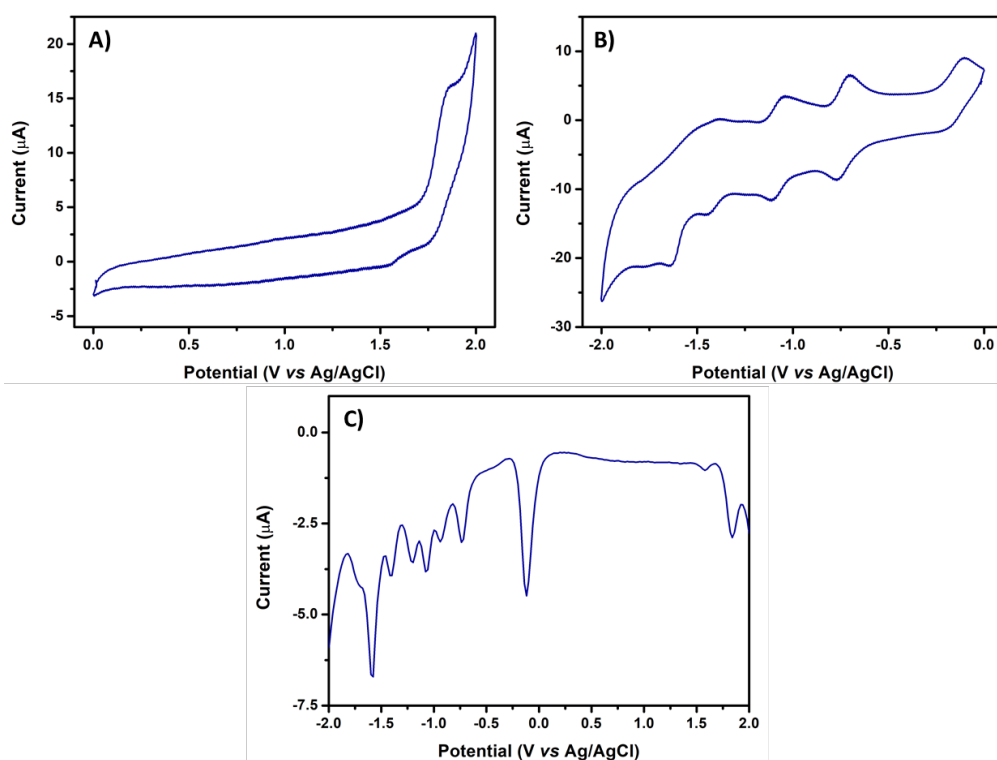

**Figure S22.** Cyclic voltammograms (A, B) and differential pulse voltammogram (C) of  $[\text{Ru}(\text{TAP})_2(\text{diiminoTAP})]^{2+}$  in acetonitrile (0.1 V/s) with tetrabutylammonium hexafluorophosphate (0.1 M) as supporting electrolyte.

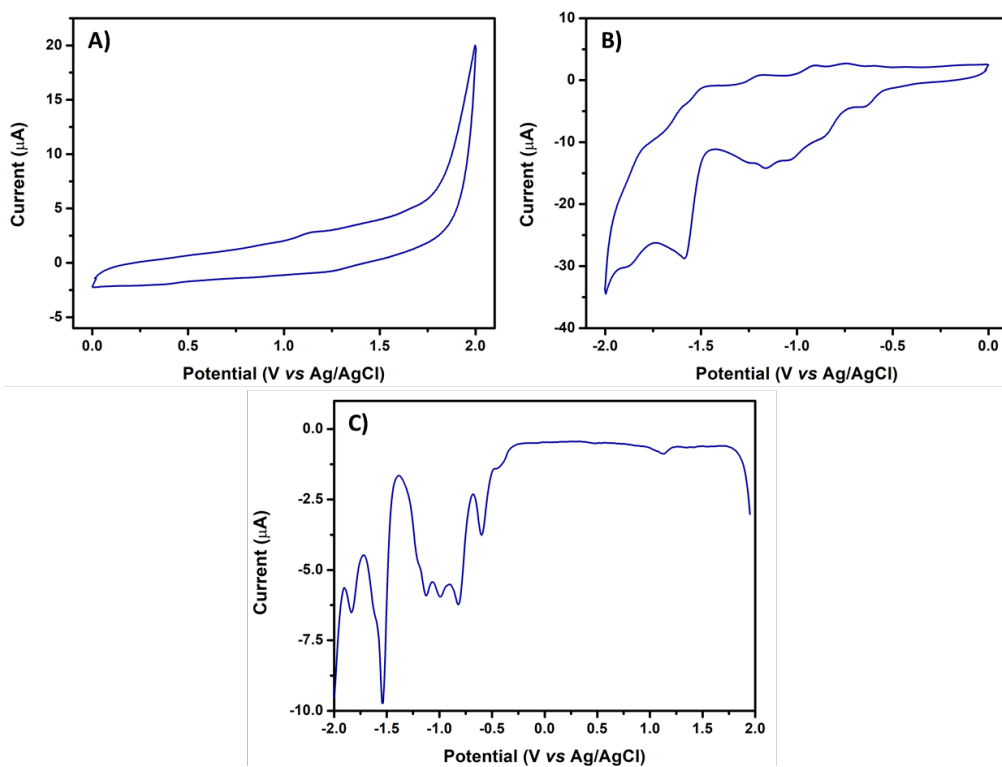

**Figure S23.** Cyclic voltammograms (A, B) and differential pulse voltammogram (C) of  $[\text{Ru}(\text{TAP})_2(\text{NO}_2\text{NH}_2\text{TAP})]^{2+}$  in acetonitrile (0.1 V/s) with tetrabutylammonium hexafluorophosphate (0.1 M) as supporting electrolyte.

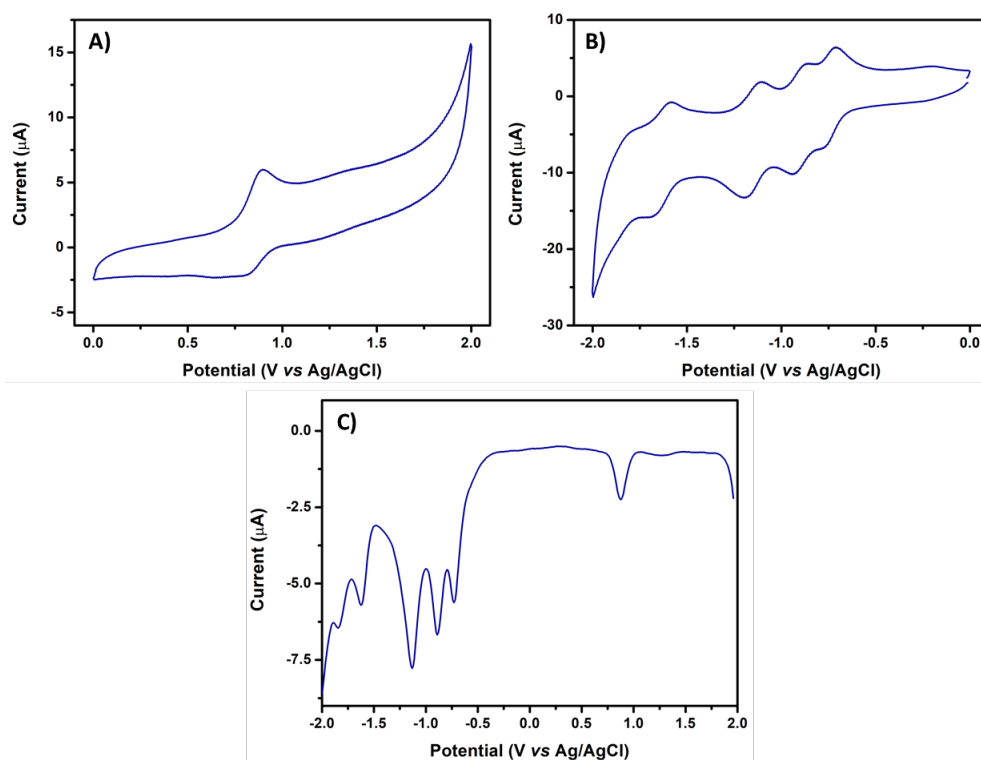

**Figure S24.** Cyclic voltammograms (A, B) and differential pulse voltammogram (C) of  $[\text{Ru}(\text{TAP})_2(\text{diNH}_2\text{TAP})]^{2+}$  in acetonitrile (0.1 V/s) with tetrabutylammonium hexafluorophosphate (0.1 M) as supporting electrolyte.

## DFT Calculations

**Table S1.** Cartesian Coordinates (in Å) of the equilibrium geometry of the singlet state of the the Ru(phen)<sub>2</sub>(diNH<sub>2</sub>TAP)]<sup>2+</sup> complex.

|    |          |          |          |
|----|----------|----------|----------|
| Ru | -0.30625 | 0.00001  | -0.00003 |
| C  | -2.45636 | -0.60559 | -2.16445 |
| C  | 1.30569  | 1.6717   | 2.10848  |
| C  | -2.45627 | 0.60519  | 2.16457  |
| C  | -2.08952 | -2.25419 | -0.54335 |
| C  | 2.50489  | 0.43593  | 0.55223  |
| C  | -2.08991 | 2.25387  | 0.54343  |
| C  | -1.36398 | -2.65822 | 0.6154   |
| C  | -1.36457 | 2.65801  | -0.6154  |
| C  | 2.50495  | -0.43552 | -0.55231 |
| C  | 0.26651  | -2.12112 | 2.2078   |
| C  | 0.26586  | 2.12118  | -2.20795 |
| C  | 1.30594  | -1.67142 | -2.10859 |
| C  | -3.4444  | -1.39815 | -2.77726 |
| C  | 2.53314  | 2.128    | 2.64142  |
| C  | -3.44434 | 1.39761  | 2.77753  |
| C  | 0.07992  | -3.36037 | 2.84764  |
| C  | 0.07894  | 3.36036  | -2.84782 |
| C  | 2.53346  | -2.12757 | -2.64151 |
| H  | -2.19793 | -0.36729 | 2.55835  |
| H  | 0.35984  | 1.98498  | 2.52416  |
| H  | -2.19819 | 0.36692  | -2.55829 |
| H  | 0.9842   | 1.40501  | -2.58059 |
| H  | 0.36013  | -1.9848  | -2.5243  |
| H  | 0.98473  | -1.40482 | 2.58041  |
| H  | 2.52803  | 2.81292  | 3.48042  |
| H  | -3.95129 | 1.01686  | 3.65486  |
| H  | -3.95154 | -1.01748 | -3.65452 |
| H  | 0.67125  | 3.59276  | -3.72346 |
| H  | 2.52845  | -2.8125  | -3.4805  |
| H  | 0.67238  | -3.5927  | 3.72319  |
| N  | -1.78614 | -1.01802 | -1.07164 |
| N  | -1.78626 | 1.01775  | 1.07167  |
| N  | 1.29004  | 0.82467  | 1.06154  |
| N  | -0.43826 | -1.76813 | 1.11566  |
| N  | 1.29017  | -0.8244  | -1.06166 |
| N  | -0.43873 | 1.76808  | -1.11572 |
| C  | -3.75354 | -2.64625 | -2.2579  |
| C  | -0.85299 | -4.26114 | 2.35637  |
| C  | -0.85409 | 4.26096  | -2.35649 |
| C  | -3.75374 | 2.64566  | 2.25822  |
| C  | -3.06769 | 3.10767  | 1.1091   |
| C  | -1.60987 | 3.91993  | -1.20889 |
| C  | 3.72997  | 0.88856  | 1.09747  |
| C  | 3.73011  | -0.88801 | -1.09752 |
| C  | -1.60897 | -3.92021 | 1.20888  |
| C  | -3.06724 | -3.10815 | -1.10889 |
| H  | -1.01086 | 5.21836  | -2.83982 |
| H  | -4.51104 | 3.2685   | 2.72035  |
| H  | -4.51083 | -3.26919 | -2.7199  |
| H  | -1.0095  | -5.21859 | 2.83968  |
| N  | 3.72365  | 1.75498  | 2.15957  |
| N  | 3.72391  | -1.75442 | -2.15962 |

|   |          |          |          |
|---|----------|----------|----------|
| C | 4.9785   | -0.4522  | -0.53863 |
| C | 4.97843  | 0.45292  | 0.53858  |
| N | 6.14479  | -0.92864 | -1.0882  |
| N | 6.14464  | 0.92952  | 1.08813  |
| H | 7.00167  | -0.94036 | -0.55855 |
| H | 6.06435  | -1.58063 | -1.85455 |
| H | 7.00158  | 0.94112  | 0.55859  |
| H | 6.06416  | 1.5815   | 1.85448  |
| C | -3.30409 | -4.3857  | -0.49077 |
| C | -2.60397 | -4.7757  | 0.61866  |
| C | -2.60495 | 4.77525  | -0.61856 |
| C | -3.30485 | 4.38516  | 0.49098  |
| H | -2.78898 | -5.74147 | 1.07523  |
| H | -4.05338 | 5.03715  | 0.92672  |
| H | -4.05257 | -5.03781 | -0.92643 |
| H | -2.79021 | 5.74097  | -1.07514 |



**Table S2.** Cartesian Coordinates (in Å) of the equilibrium geometry of the singlet state of the Ru(TAP)<sub>2</sub>(diNH<sub>2</sub>TAP)]<sup>2+</sup> complex.

|    |          |          |          |
|----|----------|----------|----------|
| Ru | -0.31824 | 0.00000  | 0.0000   |
| C  | -2.49309 | 0.67312  | 2.16127  |
| C  | 1.30081  | -1.63585 | -2.13984 |
| C  | -2.49309 | -0.67312 | -2.16127 |
| C  | -2.0796  | 2.25769  | 0.51998  |
| C  | 2.49745  | -0.42614 | -0.55962 |
| C  | -2.0796  | -2.25769 | -0.51998 |
| C  | -1.35327 | 2.64482  | -0.63082 |
| C  | -1.35327 | -2.64482 | 0.63082  |
| C  | 2.49745  | 0.42614  | 0.55962  |
| C  | 0.25699  | 2.13504  | -2.21953 |
| C  | 0.25699  | -2.13504 | 2.21953  |
| C  | 1.30081  | 1.63585  | 2.13984  |
| C  | -3.46758 | 1.54156  | 2.70642  |
| C  | 2.5311   | -2.07902 | -2.68279 |
| C  | -3.46758 | -1.54156 | -2.70642 |
| C  | 0.02248  | 3.39752  | -2.81301 |
| C  | 0.02248  | -3.39752 | 2.81301  |
| C  | 2.5311   | 2.07902  | 2.68279  |
| H  | -2.28618 | 0.28604  | -2.61207 |
| H  | 0.35708  | -1.94351 | -2.56369 |
| H  | -2.28618 | -0.28604 | 2.61207  |
| H  | 0.98528  | -1.45116 | 2.62907  |
| H  | 0.35708  | 1.94351  | 2.56369  |
| H  | 0.98528  | 1.45116  | -2.62907 |
| H  | 2.52732  | -2.74654 | -3.53534 |
| H  | -4.01947 | -1.23638 | -3.5862  |
| H  | -4.01947 | 1.23638  | 3.5862   |
| H  | 0.58776  | -3.6859  | 3.68995  |
| H  | 2.52732  | 2.74654  | 3.53534  |
| H  | 0.58776  | 3.6859   | -3.68995 |
| N  | -1.79554 | 1.02726  | 1.0683   |
| N  | -1.79554 | -1.02726 | -1.0683  |
| N  | 1.28688  | -0.81174 | -1.07763 |
| N  | -0.4308  | 1.75345  | -1.12983 |
| N  | 1.28688  | 0.81174  | 1.07763  |
| N  | -0.4308  | -1.75344 | 1.12983  |
| C  | -3.04952 | -3.12112 | -1.0739  |
| C  | -1.58572 | -3.90035 | 1.23272  |
| C  | 3.72436  | -0.86626 | -1.11307 |
| C  | 3.72436  | 0.86625  | 1.11307  |
| C  | -1.58572 | 3.90035  | -1.23272 |
| C  | -3.04952 | 3.12112  | 1.07389  |
| N  | 3.71742  | -1.71232 | -2.19183 |
| N  | 3.71742  | 1.71232  | 2.19183  |
| C  | 4.97315  | 0.44229  | 0.54833  |
| C  | 4.97315  | -0.44229 | -0.54833 |
| N  | 6.13598  | 0.90823  | 1.10783  |
| N  | 6.13598  | -0.90824 | -1.10783 |
| H  | 7.00127  | 0.91175  | 0.59255  |
| H  | 6.05844  | 1.54025  | 1.89091  |
| H  | 7.00127  | -0.91174 | -0.59255 |
| H  | 6.05844  | -1.54025 | -1.89091 |
| C  | -3.28097 | 4.39464  | 0.45178  |
| C  | -2.57332 | 4.77153  | -0.65999 |
| C  | -2.57332 | -4.77153 | 0.65999  |

|   |          |          |          |
|---|----------|----------|----------|
| C | -3.28097 | -4.39464 | -0.45178 |
| H | -2.73473 | 5.72914  | -1.13874 |
| H | -4.02925 | -5.0398  | -0.89457 |
| H | -4.02925 | 5.0398   | 0.89456  |
| H | -2.73473 | -5.72914 | 1.13874  |
| N | -0.87565 | -4.27081 | 2.3436   |
| N | -3.75058 | -2.74144 | -2.18722 |
| N | -3.75058 | 2.74144  | 2.18722  |
| N | -0.87565 | 4.27081  | -2.3436  |

**Table S3.** Cartesian Coordinates (in Å) of the equilibrium geometry of the singlet state of the Ru(phen)<sub>2</sub>(diiminoTAP)]<sup>2+</sup> complex.

|    |          |          |          |
|----|----------|----------|----------|
| Ru | 0.51642  | -0.00011 | 0.00002  |
| C  | 2.58119  | -0.69173 | 2.24967  |
| C  | 2.58175  | 0.69272  | -2.24889 |
| C  | 2.31563  | -2.26297 | 0.53792  |
| C  | -2.25753 | 0.44628  | -0.56775 |
| C  | 2.31429  | 2.26393  | -0.53741 |
| C  | 1.64276  | -2.62463 | -0.66461 |
| C  | 1.6407   | 2.62527  | 0.66483  |
| C  | -2.25742 | -0.44769 | 0.56718  |
| C  | 0.04968  | -2.04583 | -2.28448 |
| C  | 0.04728  | 2.04575  | 2.2841   |
| C  | 3.53724  | -1.5096  | 2.88058  |
| C  | 3.53714  | 1.51142  | -2.87971 |
| C  | 0.27699  | -3.25364 | -2.96873 |
| C  | 0.27333  | 3.25391  | 2.96814  |
| H  | 2.29965  | -0.25923 | -2.67412 |
| H  | 2.29798  | 0.25986  | 2.67498  |
| H  | -0.67561 | 1.32622  | 2.64087  |
| H  | -0.67349 | -1.32674 | -2.6415  |
| H  | 3.98971  | 1.17204  | -3.80247 |
| H  | 3.98929  | -1.16992 | 3.80349  |
| H  | -0.28991 | 3.45907  | 3.86919  |
| H  | -0.28568 | -3.45901 | -3.87009 |
| N  | 1.98169  | -1.05157 | 1.10047  |
| N  | 1.98158  | 1.05215  | -1.0999  |
| N  | -1.0525  | 0.77572  | -0.99723 |
| N  | 0.72004  | -1.73064 | -1.15919 |
| N  | -1.05233 | -0.77652 | 0.99694  |
| N  | 0.71844  | 1.73072  | 1.15926  |
| C  | 3.8877   | -2.72732 | 2.31843  |
| C  | 1.2099   | -4.15923 | -2.48586 |
| C  | 1.20575  | 4.16007  | 2.48543  |
| C  | 3.88638  | 2.72951  | -2.31761 |
| C  | 3.26742  | 3.13898  | -1.11178 |
| C  | 1.9202   | 3.8588   | 1.30073  |
| C  | -3.51683 | 0.89459  | -1.13493 |
| C  | -3.51658 | -0.89631 | 1.13444  |
| C  | 1.92359  | -3.85773 | -1.30075 |
| C  | 3.2694   | -3.13721 | 1.11239  |
| H  | 1.3906   | 5.09453  | 3.00261  |
| H  | 4.62183  | 3.37007  | -2.79056 |
| H  | 4.62366  | -3.36722 | 2.79146  |
| H  | 1.39583  | -5.09331 | -3.00331 |
| C  | -4.7401  | 0.45422  | -0.57702 |
| C  | 3.54971  | -4.38207 | 0.4476   |
| C  | 2.9048   | -4.72762 | -0.70905 |
| C  | 2.90083  | 4.72944  | 0.70918  |
| C  | 3.54642  | 4.38423  | -0.44718 |
| H  | 3.12104  | -5.6694  | -1.20029 |
| H  | 4.28154  | 5.04891  | -0.88636 |
| H  | 4.28533  | -5.04616 | 0.88685  |
| H  | 3.11603  | 5.67155  | 1.20024  |
| C  | -4.73999 | -0.45614 | 0.57663  |
| C  | -4.65119 | 2.13537  | -2.71152 |
| C  | -5.8714  | 1.70149  | -2.16005 |
| C  | -4.65063 | -2.13754 | 2.71102  |

|   |          |          |          |
|---|----------|----------|----------|
| C | -5.87093 | -1.70385 | 2.15965  |
| H | -1.02866 | 1.41249  | -1.79784 |
| H | -1.02842 | -1.41315 | 1.79766  |
| N | -5.91763 | -0.87243 | 1.10488  |
| N | -3.4774  | -1.73454 | 2.19946  |
| N | -3.47786 | 1.73262  | -2.20006 |
| N | -5.91788 | 0.87013  | -1.10529 |
| H | -6.81659 | 2.02862  | -2.57561 |
| H | -4.6247  | 2.80447  | -3.56238 |
| H | -6.81603 | -2.03107 | 2.57534  |
| H | -4.62391 | -2.8066  | 3.56191  |

**Table S4.** Cartesian Coordinates (in Å) of the equilibrium geometry of the singlet state of the Ru(TAP)<sub>2</sub>(diiminoTAP)]<sup>2+</sup> complex.

|    |          |          |          |
|----|----------|----------|----------|
| Ru | -0.54025 | 0.00000  | 0.00000  |
| C  | -2.63732 | -0.76429 | -2.22808 |
| C  | -2.63731 | 0.76432  | 2.22808  |
| C  | -2.30234 | -2.27644 | -0.50568 |
| C  | 2.23956  | 0.44861  | 0.57132  |
| C  | -2.30231 | 2.27646  | 0.50568  |
| C  | -1.61972 | -2.62064 | 0.68423  |
| C  | -1.61969 | 2.62065  | -0.68423 |
| C  | 2.23955  | -0.44864 | -0.57131 |
| C  | -0.04619 | -2.06251 | 2.2966   |
| C  | -0.04617 | 2.0625   | -2.29661 |
| C  | -3.58011 | -1.66042 | -2.786   |
| C  | -3.58008 | 1.66046  | 2.786    |
| C  | -0.30462 | -3.30186 | 2.92897  |
| C  | -0.30459 | 3.30184  | -2.92898 |
| H  | -2.41241 | -0.17607 | 2.70828  |
| H  | -2.41241 | 0.17609  | -2.70828 |
| H  | 0.67986  | 1.36885  | -2.69364 |
| H  | 0.67985  | -1.36888 | 2.69364  |
| H  | -4.08565 | 1.39584  | 3.70578  |
| H  | -4.08567 | -1.39579 | -3.70577 |
| H  | 0.23492  | 3.56127  | -3.83069 |
| H  | 0.23488  | -3.56129 | 3.83068  |
| N  | -2.00059 | -1.06631 | -1.08564 |
| N  | -2.00058 | 1.06633  | 1.08564  |
| N  | 1.04161  | 0.77739  | 1.00152  |
| N  | -0.70671 | -1.71937 | 1.17838  |
| N  | 1.0416   | -0.77741 | -1.00152 |
| N  | -0.70669 | 1.71937  | -1.17838 |
| C  | -3.24292 | 3.16624  | 1.06771  |
| C  | -1.87218 | 3.85435  | -1.32261 |
| C  | 3.5017   | 0.89576  | 1.13747  |
| C  | 3.5017   | -0.89579 | -1.13747 |
| C  | -1.87222 | -3.85435 | 1.32261  |
| C  | -3.24296 | -3.16621 | -1.06771 |
| C  | 4.72194  | 0.45536  | 0.57803  |
| C  | -3.50127 | -4.4141  | -0.40518 |
| C  | -2.83951 | -4.74666 | 0.74819  |
| C  | -2.83945 | 4.74669  | -0.7482  |
| C  | -3.50121 | 4.41413  | 0.40518  |
| H  | -3.01945 | -5.68534 | 1.25677  |
| H  | -4.23006 | 5.07747  | 0.85342  |
| H  | -4.23012 | -5.07743 | -0.85342 |
| H  | -3.01938 | 5.68536  | -1.25678 |
| C  | 4.72194  | -0.45539 | -0.57803 |
| C  | 4.63322  | 2.13536  | 2.71427  |
| C  | 5.85313  | 1.70104  | 2.16123  |
| C  | 4.63321  | -2.13538 | -2.71427 |
| C  | 5.85312  | -1.70107 | -2.16123 |
| H  | 1.01746  | 1.41328  | 1.80346  |
| H  | 1.01745  | -1.41329 | -1.80345 |
| N  | 5.89962  | -0.87035 | -1.10553 |
| N  | 3.4604   | -1.73215 | -2.20199 |
| N  | 3.46041  | 1.73213  | 2.202    |
| N  | 5.89962  | 0.87032  | 1.10553  |
| H  | 6.79854  | 2.0277   | 2.57628  |

|   |          |          |          |
|---|----------|----------|----------|
| H | 4.60673  | 2.80378  | 3.56532  |
| H | 6.79853  | -2.02773 | -2.57628 |
| H | 4.60672  | -2.8038  | -3.56532 |
| N | -1.1948  | 4.18592  | -2.46567 |
| N | -3.8888  | 2.83634  | 2.22923  |
| N | -1.19485 | -4.18592 | 2.46566  |
| N | -3.88884 | -2.8363  | -2.22923 |
